# Supplementary material for: Human Costars Family Protein ABRACL Modulates Actin Dynamics and Cell Migration and Associates with Tumorigenic Growth
Source: PubMed Central journal article supplement (PMC7922284; doi:10.3390/ijms22042037), 2021-02-18
Supplement: ijms-22-02037-s001.pdf [file ijms-22-02037-s001.pdf]

## Supplementary Materials for

# Human Costars family protein ABRACL modulates actin dynamics and cell migration and associates with tumorigenic growth

Bo-Yuan Hsiao <sup>1</sup>, Chia-Hsin Chen <sup>1</sup>, Ho-Yi Chi <sup>1</sup>, Pei-Ru Yen <sup>1</sup>, Ying-Zhen Yu <sup>1</sup>, Chia-Hsin Lin <sup>2</sup>, Te-Ling Pang <sup>1</sup>, Wei-Chi Lin <sup>1</sup>, Min-Lun Li<sup>1</sup>, Yi-Chen Yeh <sup>3</sup>, Teh-Ying Chou <sup>1,3,4,5</sup> and Mei-Yu Chen <sup>1,2,5,\*</sup>

- <sup>1</sup> Institute of Biochemistry and Molecular Biology, National Yang-Ming University, No.155, Sec. 2, Linong St., Beitou Dist., Taipei 11221, Taiwan; [BYHsiao0916@gmail.com](mailto:BYHsiao0916@gmail.com) (B.-Y.H.); [s7532853@gmail.com](mailto:s7532853@gmail.com) (C.-H.C.); [joeinter3690@gmail.com](mailto:joeinter3690@gmail.com) (H.-Y.C.); [ruby781027@gmail.com](mailto:ruby781027@gmail.com) (P.-R.Y.); [clareyu77@gmail.com](mailto:clareyu77@gmail.com) (Y.-Z.Y.); [chlin1016@cgmh.org.tw](mailto:chlin1016@cgmh.org.tw) (C.-H.L.); [celine.pang@uwell.com.tw](mailto:celine.pang@uwell.com.tw) (T.-L.P.); [weichi0905638@gmail.com](mailto:weichi0905638@gmail.com) (W.-C.L.); [lazystream@gmail.com](mailto:lazystream@gmail.com) (M.-L.L.); [tychou@vghtpe.gov.tw](mailto:tychou@vghtpe.gov.tw) (T.-Y.C.); [meychen@ym.edu.tw](mailto:meychen@ym.edu.tw) (M.-Y.C.)
  - <sup>2</sup> School of Medicine, National Yang-Ming University, No.155, Sec. 2, Linong St., Beitou Dist., Taipei 11221, Taiwan; [chlin1016@cgmh.org.tw](mailto:chlin1016@cgmh.org.tw) (C.-H.L.); [meychen@ym.edu.tw](mailto:meychen@ym.edu.tw) (M.-Y.C.)
  - <sup>3</sup> Department of Pathology and Laboratory Medicine, Taipei Veterans General Hospital, No.201, Sec. 2, Shipai Rd., Beitou Dist., Taipei 11217, Taiwan; [ycyeh2@vghtpe.gov.tw](mailto:ycyeh2@vghtpe.gov.tw) (Y.-C.Y.); [tychou@vghtpe.gov.tw](mailto:tychou@vghtpe.gov.tw) (T.-Y.C.)
  - <sup>4</sup> Institute of Clinical Medicine, National Yang-Ming University, No.155, Sec. 2, Linong St., Beitou Dist., Taipei 11221, Taiwan; [tychou@vghtpe.gov.tw](mailto:tychou@vghtpe.gov.tw) (T.-Y.C.)
  - <sup>5</sup> Cancer Progression Research Center, National Yang-Ming University, No.155, Sec. 2, Linong St., Beitou Dist., Taipei 11221, Taiwan; [tychou@vghtpe.gov.tw](mailto:tychou@vghtpe.gov.tw) (T.-Y.C.); [meychen@ym.edu.tw](mailto:meychen@ym.edu.tw) (M.-Y.C.)
- \* Correspondence: [meychen@ym.edu.tw](mailto:meychen@ym.edu.tw); Tel.: +886-02-2826-7269

This file contains:

### Supplementary Tables

**Table S1.** Plasmids and primers used in this study

### Supplementary Figures and legends

**Figure S1.** ABRACL expression in human cancer cell lines

**Figure S2.** *In vitro* F-actin co-sedimentation assay

**Figure S3.** Testing ABRACL and cofilin in *in vitro* F-actin co-sedimentation

**Figure S4.** Upregulation of the *ABRACL* transcript level in various types of cancer

## Supplementary Tables

**Table S1.** Plasmids and primers used in this study

| Plasmid                                                       | Plasmid backbone     | Primers for construction / Target sequences (5'--> 3')                                                                                                                                                                         | Description                                                                                                                                                                                                                                                                                   | Source                  |
|---------------------------------------------------------------|----------------------|--------------------------------------------------------------------------------------------------------------------------------------------------------------------------------------------------------------------------------|-----------------------------------------------------------------------------------------------------------------------------------------------------------------------------------------------------------------------------------------------------------------------------------------------|-------------------------|
| <b>For expression of ABRACL in cancer cell lines</b>          |                      |                                                                                                                                                                                                                                |                                                                                                                                                                                                                                                                                               |                         |
| pcDNA-HA-ABRACL                                               | pcDNA3.0-HA          | Forward primer:<br>ACGGATCCATGAATGTGGATCAC<br>GA<br>Reverse primer:<br>ACGAATTCTTAATCTTGCAGTAA<br>TATAATG                                                                                                                      | A PCR-amplified fragment containing the coding sequence (CDS) of <i>ABRACL</i> was digested with restriction enzymes ( <i>Bam</i> HI and <i>Eco</i> RI) and inserted into the pcDNA3.0-HA vector.                                                                                             | This study              |
| pEGFP-C1-ABRACL                                               | pEGFP-C1             | Forward primer:<br>ATCTCGAGCCATGAATGTGGATC<br>ACGAGGT<br>Reverse primer:<br>GAATTCGCAGATCGTCAGTCAGT<br>CAC                                                                                                                     | A PCR-amplified fragment containing the CDS of <i>ABRACL</i> was digested with restriction enzymes ( <i>Xho</i> I and <i>Eco</i> RI) and inserted into the pEGFP-C1 vector.                                                                                                                   | This study              |
| pcDNA3.1-myc-His-ABRACL                                       | pcDNA3.1-myc-His(-)B | Forward primer:<br>ACGACTCGAGCGATGAATGTGG<br>ATCACGAGGTTAAC<br>Reverse primer:<br>AGGAAGCTTGGATCTTGCAGTA<br>ATATAATGTCAAC                                                                                                      | A PCR-amplified fragment containing the CDS of <i>ABRACL</i> was digested with restriction enzymes ( <i>Xho</i> I and <i>Hind</i> III) and inserted into the pcDNA3.1-myc-His(-)B vector.                                                                                                     | This study              |
| <b>For Lentivirus-delivered shRNA-mediated gene knockdown</b> |                      |                                                                                                                                                                                                                                |                                                                                                                                                                                                                                                                                               |                         |
| pLKO-shLuc                                                    | pLKO_TRC005          | Target sequence:<br>GCGGTTGCCAAGAGGTTCCAT                                                                                                                                                                                      | Targeting the 3'-UTR of Luciferase gene                                                                                                                                                                                                                                                       | Academia Sinica, Taiwan |
| pLKO-sh295                                                    | pLKO_TRC005          | Target sequence:<br>TCCTCTCCGTGATGATAAAT                                                                                                                                                                                       | Targeting the CDS of <i>ABRACL</i> gene                                                                                                                                                                                                                                                       | Academia Sinica, Taiwan |
| pLKO-sh484                                                    | pLKO_TRC005          | Target sequence:<br>TTCTGGTAAACTGGAATATAA                                                                                                                                                                                      | Targeting the 3'-UTR of <i>ABRACL</i> gene                                                                                                                                                                                                                                                    | Academia Sinica, Taiwan |
| pLKO-shCFL1                                                   | pLKO.1               | Target sequence:<br>CTATGAGACCAAGGAGAGCAA                                                                                                                                                                                      | Targeting the CDS of <i>CFL1</i> gene                                                                                                                                                                                                                                                         | Academia Sinica, Taiwan |
| <b>For CRISPR/Cas9-mediated <i>ABRACL</i> knockout</b>        |                      |                                                                                                                                                                                                                                |                                                                                                                                                                                                                                                                                               |                         |
| pgRNA-ABRACL-g1                                               | gRNA_Cloning Vector  | Forward primer:<br>TTTCTGGCTTTATATATCTTGTG<br>GAAAGGACGAAACACCGTGGA<br>GGAAATTCATCGTTT<br>Reverse primer:<br>GACTAGCCTTATTTAACTTGCTA<br>TTTCTAGCTCTAAAACAAACGAT<br>GAATTCCTCCAC<br>Target sequence:<br>TGGAGGAAATTCATCGTTT     | Primers carrying a guide sequence for CRISPR/Cas9-mediated gene knockout were annealed and extended into a dsDNA fragment using the KOD plus polymerase. The 100-bp DNA fragment was then incorporated into the <i>Afl</i> II-linearized gRNA_Cloning Vector by the Gibson Assembly reaction. | This study              |
| pgRNA-ABRACL-g2                                               | gRNA_Cloning Vector  | Forward primer:<br>TTTCTGGCTTTATATATCTTGTG<br>GAAAGGACGAAACACCGCGAG<br>GTTAACCTCTTAGTGG<br>Reverse primer:<br>GACTAGCCTTATTTAACTTGCTA<br>TTTCTAGCTCTAAAACCCACTAA<br>GAGGTTAACCTCGC<br>Target sequence:<br>CGAGGTTAACCTCTTAGTGG |                                                                                                                                                                                                                                                                                               | This study              |

|                                                          |                     |                                                                                                                                                                                                                         |                                                                                                                                                                                  |            |
|----------------------------------------------------------|---------------------|-------------------------------------------------------------------------------------------------------------------------------------------------------------------------------------------------------------------------|----------------------------------------------------------------------------------------------------------------------------------------------------------------------------------|------------|
| pgRNA-ABRACL-g3                                          | gRNA_Cloning Vector | Forward primer:<br>TTTCTGGCTTTATATATCTTG<br>GAAAGGACGAAACACCGATGA<br>ATTCCTCCACTAAG<br>Reverse primer:<br>GACTAGCCTTATTTAACTTGCTA<br>TTTCTAGCTCTAAAACCTTAGTG<br>GAGGAAATTCATC<br>Target sequence:<br>ATGAATTCCTCCACTAAG |                                                                                                                                                                                  | This study |
| For expression of recombinant proteins in <i>E. coli</i> |                     |                                                                                                                                                                                                                         |                                                                                                                                                                                  |            |
| pGEX-5X-3-ABRACL                                         | pGEX-5X-3           | -                                                                                                                                                                                                                       | A fragment containing the CDS of <i>ABRACL</i> was obtained from pTX-GFP-mCostars <sup>1</sup> by <i>EcoRI</i> and <i>XhoI</i> digestion and inserted into pGEX-5X-3             | This study |
| pRSET-C-CFL1                                             | pRSET-C             | Forward primer:<br>ACGGATCCTTATGGCCTCCGGTG<br>TGGCT<br>Reverse primer:<br>ACGAATTCTCACAAAGGCTTGC<br>CCTCCA                                                                                                              | A PCR-amplified fragment containing the CDS of the cofilin-1 gene <i>CFL1</i> was digested with restriction enzymes ( <i>BamHI</i> and <i>EcoRI</i> ) and inserted into pRSET-C. | This study |
| pRSET-C-CFL1-S3A                                         | pRSET-C-CFL1        | Forward primer:<br>ATCGATGGATCCTTATGGCCGCC<br>GGTGTGGCTG<br>Reverse primer:<br>GGCCATAAGGATCCATCGATCCT<br>TATCGTC                                                                                                       | Oligonucleotide-mediated site-directed mutagenesis was performed on pRSET-C-CFL1 using a PCR-based method.                                                                       | This study |
| pRSET-C-CFL1-S3D                                         | pRSET-C-CFL1        | Forward primer:<br>ATCGATGGATCCTTATGGCCGAC<br>GGTGTGGCTG<br>Reverse primer:<br>GGCCATAAGGATCCATCGATCCT<br>TATCGTC                                                                                                       |                                                                                                                                                                                  | This study |
| pRSET-C-CFL1-S3E                                         | pRSET-C-CFL1        | Forward primer:<br>ATCGATGGATCCTTATGGCCGAA<br>GGTGTGGCTG<br>Reverse primer:<br>GGCCATAAGGATCCATCGATCCT<br>TATCGTC                                                                                                       |                                                                                                                                                                                  | This study |

<sup>1</sup>Pang, T. L. et al. Costars, a *Dictyostelium* protein similar to the C-terminal domain of STARS, regulates the actin cytoskeleton and motility. *J Cell Sci* **123**, 3745-3755, doi:10.1242/jcs.064709 (2010).

## Supplementary Figures and legends

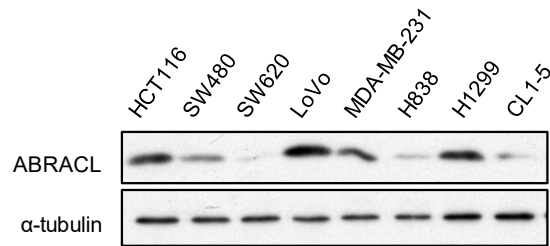

**Figure S1.** ABRACL expression in human cancer cell lines. Total cell lysates were collected and examined for the expression of ABRACL by Western analysis;  $\alpha$ -tubulin expression was used as a loading control. HCT116, SW480, SW620, and LoVo are colon cancer cell lines. H838, H1299, and CL1-5 are lung cancer cell lines. MDA-MB-231 is a breast cancer cell line. All cell lines were obtained from the Bioresource Collection and Research Center, Taiwan.

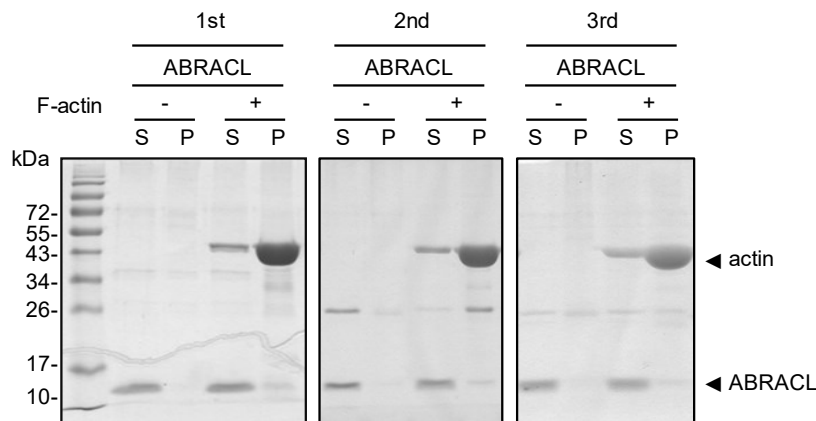

**Figure S2.** *In vitro* F-actin co-sedimentation assay. Recombinant ABRACL was purified as in Figure 4A and incubated with or without preformed F-actin. After centrifugation, supernatant (S) and pellet (P) fractions were analyzed by SDS-PAGE and stained with Coomassie Blue. Shown are three independent co-sedimentation tests performed as in Figure 4B. The gel image of the 3<sup>rd</sup> test is part of the image shown in Figure S3.

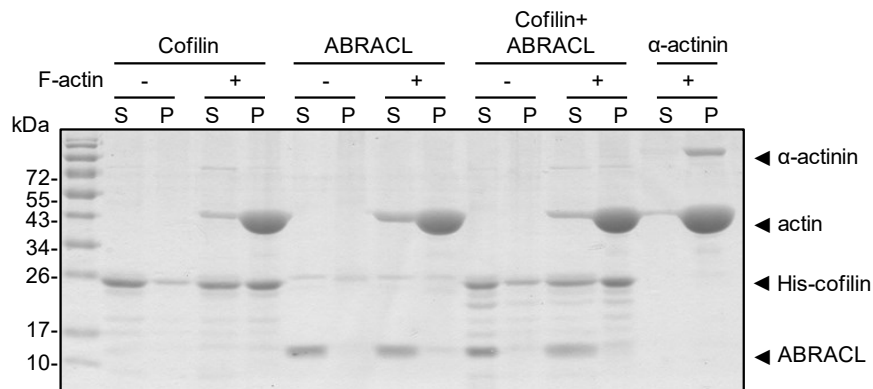

**Figure S3.** Testing ABRACL and cofilin in *in vitro* F-actin co-sedimentation. Reactions containing purified recombinant ABRACL (25  $\mu$ M) and/or recombinant human His-cofilin (25  $\mu$ M) incubated with or without preformed F-actin were subjected to centrifugation to sediment F-actin. Resulting supernatant (S) and pellet (P) fractions were analyzed by SDS-PAGE and stained with Coomassie Blue. Commercially available purified  $\alpha$ -actinin was used as a positive control for F-actin binding.

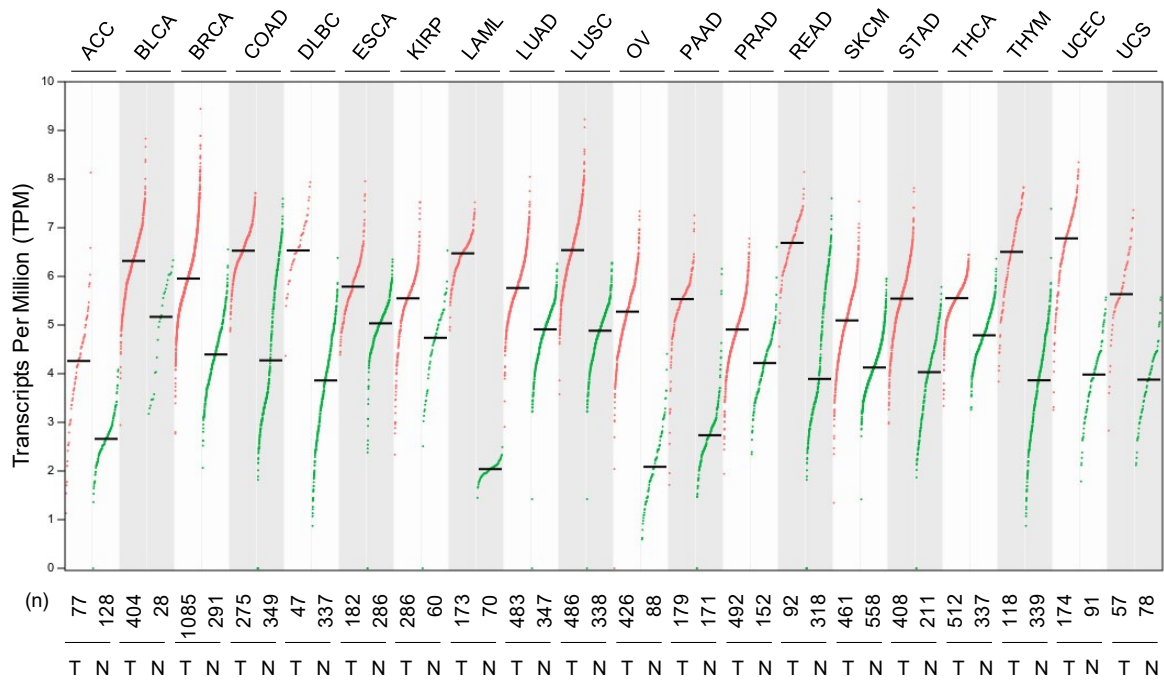

**Figure S4.** Upregulation of the *ABRACL* transcript level in various types of cancer. Shown are *ABRACL* transcript levels in corresponding tumor (T) and normal (N) tissues. The chart was derived using the GEPIA server, analyzing data from the Cancer Genome Atlas (TCGA) and Genotype-Tissue Expression (GTEx) databases. Cancer types are indicated on the top; ACC, adrenocortical carcinoma; BLCA, bladder urothelial carcinoma; BRCA, breast invasive carcinoma; COAD, colon adenocarcinoma; DLBC, lymphoid neoplasms diffuse large B-cell lymphoma; ESCA, esophageal carcinoma; KIRP, kidney renal papillary cell carcinoma; LAML, acute myeloid leukemia; LUAD, lung adenocarcinoma; LUSC, lung squamous cell carcinoma; OV, ovarian serous cystadenocarcinoma; PAAD, pancreatic adenocarcinoma; PRAD, prostate adenocarcinoma; READ, rectum adenocarcinoma; SKCM, skin cutaneous melanoma; STAD, stomach adenocarcinoma; THCA, thyroid carcinoma; THYM, thymoma; UCEC, uterine corpus endometrial carcinoma; UCS, uterine carcinosarcoma. Red and green dots represent data from cancerous and normal tissues, respectively; total numbers (n) of samples in each set are shown below the chart. Statistical analyses of the results indicated that *ABRACL* expression was significantly different ( $p < 0.05$ ) between cancerous and normal samples in all types of cancer shown in this chart.
